26 **ABSTRACT**

27 **Purpose** - The purpose of this study is to capture the determinants of thyroid dysfunction in  
28 type 2 diabetes mellitus at private hospitals in Dire-Dawa, Eastern Ethiopia. Various studies  
29 found that thyroid dysfunction is common in type 2 diabetes and it is associated with poor  
30 blood glucose control and chronic diabetic complications responsible for morbidity and  
31 mortality. However, only limited studies have assessed determinants of thyroid dysfunctions  
32 among type 2 diabetes in Ethiopia.

33 **Methods** – Unmatched case-control study conducted in two private hospitals found in Dire  
34 Dawa town, between May - November 2021. A total of 92 type 2 diabetic patients with  
35 thyroid dysfunction as Cases and 183 type 2 diabetes patients with normal thyroid function as  
36 controls selected by purposive and systematic random sampling, respectively. Data collected  
37 by interview and using checklist, entered into SPSS version 22, and analyzed. Bivariate and  
38 multivariate logistic regression analysis employed to identify determinants of thyroid  
39 dysfunction with AOR and 95%CI. Independent t-test computed to observe significant mean  
40 difference of continuous variables. Variables with *P-value* < 0.05 declared as significant.

41 **Result** - Female gender predominate 65.9% of participants ( $p= 0.02$ ). The mean glycosylated  
42 hemoglobin level among cases was 10.32 ( $\pm 2.4$  SD) and 9.249 ( $\pm 2.3$  SD) among controls,  
43 with significant difference ( $p=0.001$ ). Similarly, the mean LDL cholesterol among cases  
44 116.92  $\pm 45.9$  SD and control 102.34  $\pm 43.97$ SD showed significant difference ( $p=0.016$ ).  
45 Diabetic retinopathy and neuropathy, and ACEI/ARB also significantly associated with  
46 thyroid dysfunction ( $p < 0.05$ ).

47 **Conclusion** – Female gender, lower educational level, and duration of diabetes associated  
48 with thyroid dysfunction. Most patients in both groups had unacceptably elevated HgA1c  
49 which need to be addressed. Thus, screening for thyroid dysfunction, especially the female  
50 gender, needs to be done.

## 51 **Introduction**

52 Thyroid dysfunction (TD) is a condition characterized by an increase or decrease production  
53 of thyroid hormones with reciprocal change in pituitary secreted thyroid-stimulating  
54 hormone( TSH). All forms of TD - subclinical or clinical hypothyroidism or hyperthyroidism,  
55 mainly arise from pathology within the thyroid gland, although rarely they may originate  
56 from disorders of the hypothalamus or pituitary [1-2] and are associated with increased  
57 mortality [3].

58 The magnitude of TD is inconsistent in different parts of the world and relay on the level of  
59 iodine sufficiency, race, and population dynamics. The magnitude of overt hyperthyroidism  
60 ranges from 0.2% to 1.3%; hypothyroidism ranges from 1% to 2%, rising with age in iodine-  
61 sufficient parts of the world [4].

62 Studies have found a positive relationship between TD and type 2 diabetes mellitus (T2DM).  
63 There is also biochemical and clinical evidence that both endocrine diseases have shown to  
64 mutually influence each other [5-7] with reported 10-32% overall prevalence of TD in type 2  
65 diabetes. Moreover, diabetes patients who have TD tend to have poorer glycemic control, an  
66 increased risk of lipid disorders, high blood pressure, and atherosclerosis which may  
67 accelerate diabetic vascular complications. A link between TD and microvascular  
68 complications and coronary artery diseases also reported [5, 8-9].

69 Despite an increasing global body of knowledge on the association of the two endocrine  
70 diseases, there is no clear guideline on screening T2DM patients for TD [10]. Moreover,  
71 predictors of TD in T2DM patients in different studies are inconsistent probably related to the  
72 difference in study design, characteristics of study subjects, and other conditions.

73 In Ethiopia, there is no nationwide prevalence or population-based data on the extent of TD,  
74 nor do we have any data on its prevalence in the diabetic population. Published or  
75 unpublished studies regarding TD among T2DM patients as well as predictors are also

76 lacking. However, about 1.7 million adults aged 20–79 year old have had diabetes and the  
77 2017 projected prevalence of diabetes in Ethiopia in these age groups was about 5.2% [11].  
78 This indicates how big the problem is. Hence identifying determinants of TD in T2DM  
79 patients, contribution of TD for dysglycemia and chronic diabetic complications has public  
80 health importance.

81 When it comes to Dire Dawa, laboratory test for thyroid function and HgA1c is not currently  
82 done in public hospitals, and this leaves most T2DM patients not knowing their thyroid status  
83 and long term blood glucose control. In addition, there is knowledge gap among health  
84 professionals on the importance of TD in diabetes patients [12]. This study was aimed to  
85 identify predictors of TD in T2DM patients in Dire Dawa, Eastern Ethiopia. The findings  
86 have revealed important factors of TD and fill most of aforementioned gaps.

## 87 **Method and Materials**

### 88 **Study area**

89 The study was conducted in Dire Dawa city administration which is located at eastern part of  
90 Ethiopia, about 515km away from capital Addis Ababa. Dire Dawa comprises 453,000  
91 population, of whom 227,406 (50.2%) are males and 225,594 (49.8) females. There are 6  
92 hospitals (3 governmental, and 3 private), 15 Health center (8 urban and 7 rural), 34 health  
93 post, 56 primary, medium, and specialty clinic, and also 30 pharmacies, 42 drug vendor and 4  
94 private hospital pharmacy found in the Administration.[13].

95 Bilal hospital is a private hospital owned by Ethio-American Physician, and started 15 years  
96 back. It provides inpatient and outpatient services in the disciplines of internal medicine,  
97 gynecology and obstetrics, and general surgical services. The hospital has well-established  
98 chronic disease follow-up clinics including diabetes, cardiovascular, and thyroid disorder.  
99 Patients served in the hospital include the surrounding regional states, neighboring Somalia,

100 Somaliland state, and Djibouti. It has about 50 beds, 30 of which are dedicated to medical  
101 patients. Delt hospital is a tertiary care setup that incorporates all major medical specialties  
102 and gastroenterology subspecialty service. It provides inpatient for all major disciplines.

### 103 **Study Design and Period**

104 Unmatched case-control study design employed and conducted between May 15 and July 15,  
105 2021 in Bilal and DELT hospitals, Dire Dawa.

### 106 **Source and Study Population**

107 The source populations consisted of T2DM patients who have follow up in selected private  
108 hospitals. Whereas, randomly selected T2DM patients with TD (cases) and without TD  
109 (controls) comprised the study population.

110 **Inclusion Criteria for Control:** T2DM patients with at least 3 months follow up in selected  
111 hospitals, or later transferred to other hospitals in Dire Dawa who have normal TSH value  
112 (0.45-4.12 mU/L), or who was not taking treatment for thyroid dysfunction.

113 **Inclusion Criteria for Cases:** T2DM patients who have TD based on abnormal TSH value  
114 ( $TSH < 0.45\text{mU/L}$  and  $TSH > 0.412\text{ mU/L}$ ), or who was taking treatment for TD and with at  
115 least 3 months of follow up in selected hospitals, or later transferred to other hospitals in  
116 Dire-Dawa.

117 **Exclusion Criteria for Controls:** T2DM patients who were taking or took amiodarone or  
118 underwent contrast imaging.

119 Patients with T2DM who are not tested for TSH value and their TD status remained  
120 unknown.

### 121 **Sample Size Determination**

122 The sample size was determined using software Open-Epi, Version 3, open-source calculator-  
123 -SSCC this web site <https://www.openepi.com/SampleSize/SSCohort.htm>, sample size  
124 calculations for unmatched case-control. By taking power of 80%, a cases to control ratio of

125 1:2, proportion of controls with exposure (0.435), proportion of cases with exposure (0.614)  
126 taking the proportion of elevated glycated hemoglobin level (> 7%) from Ogbanno et al 2019,  
127 the least Odds Ratio to be detected of 2.07 and 95% two-level confidence interval [14].  
128 Accordingly, a total sample size of 275 (92 cases and 183 controls) taken.

### 129 **Sampling Procedure**

130 A purposive sampling technique used to select cases as the cases are rare. Systematic random  
131 sampling method used to select controls at interval of every 2 control patients.

### 132 **Data Collection Procedure**

133 Eligible study participants interviewed face to face using structured data collection tools. A  
134 data abstraction format used to collect information from participants' medical records. The  
135 tool comprised information about socio-demographic, anthropometric characteristics of the  
136 patients, clinical variables taken from patient interviews, and a checklist to review patients'  
137 medical records including laboratory, imaging variables, and drug regimens used by study  
138 participants. During an interview session, COVID- 19 prevention measures strictly followed:  
139 well-ventilated room and maintaining 2 meter distance, data collectors and each interviewee  
140 wore face mask prior to interview, hand sanitizer and clean gloves used whenever needed.

### 141 **Study Variables**

#### 142 **Dependent variable**

- 143 • Thyroid dysfunction in type 2 diabetes patients

#### 144 **Independent variables:**

- 145 • Socio-demographic like age, gender, educational status, income, marital status, and  
146 occupation;
- 147 • Lifestyle factors including dietary preference, smoking, alcohol consumption and  
148 physical exercise;

- 149       • Knowledge and behavioral factors like adherence to diabetes self-management and  
150       knowledge of target blood glucose;
- 151       • Clinical and treatment factors such as clinical findings of chronic diabetic  
152       complications, clinical findings of thyroid dysfunction, echocardiography  
153       abnormality, drug regimens, laboratory tests including serum creatinine, blood lipid  
154       profile (total cholesterol, LDL, triglyceride, HDL, non HDL values), and hemoglobin  
155       level. Glycemic control was assessed by the level of glycated hemoglobin (HbA1c).

### 156 **Operational/ Standard Definition**

157 ***Thyroid dysfunction***; for this study, we use TSH as a marker of thyroid function.

158 Based on literature TSH is the best and, often times, the only test needed. [15]

- 159       • Hypothyroidism is TSH > 4.12mU/L
- 160       • Hyperthyroidism if TSH values are < 0.45mU/L

161 ***Glycemic control***: For this study, we categorized the study participants in to two groups  
162 based on the American Diabetes Association (ADA) recommendation [16]

- 163       • Good glycemic control: HbA1c < 7%
- 164       • Poor glycemic control: HbA1c > 7%

165 ***Glycosylated hemoglobin***: Hemoglobin to which glucose is bound. The level of glycosylated  
166 hemoglobin is increased in the red blood cells of persons with poorly controlled diabetes  
167 mellitus. [67]

168 ***Diabetic nephropathy*** is defined as a history of diabetes with the presence of albuminuria,  
169 impaired glomerular filtration rate, or both (eGFR <60ml/min/1.73m<sup>2</sup>) [17]

170 ***Estimated glomerular filtration rate (eGFR)*** was calculated using the equation:  $186 \times \text{serum}$   
171  $\text{Cr}^{-1.154} \times \text{age}^{-0.203} \times 0.742$  (if female)  $\times 1.233$  [17].

172 **Diabetic neuropathy** was diagnosed based on abnormalities detected during neuropathic  
173 screening test (vibration sense testing, temperature sense, pain perception, monofilament  
174 testing, and examination of reflexes). [16]

175 **Alcohol consumption:** if reported consumption of alcohol twelve months before the study

176 **Current tobacco smoke** is defined when a participant reported that he or she smoked tobacco  
177 products daily during the data collection period

178 **Adherence to medication:** if patients took all his/her anti-diabetic medication in last 7 days.

179 **Adherence to blood glucose testing:** if the patient measured his blood glucose for more than  
180 3 days in last seven days.

181 **Adherence to diet:** If patients followed recommended diet for more than 3 days in last 7 days.

182 **Adherence to exercise:** If the patient follows recommended level of exercise for more than 3  
183 days in last seven days.

#### 184 **Data Processing and Analysis**

185 The collected data coded and entered into Epi Data 4.2 software to minimize errors made  
186 while data entry. Then entered data transported to SPSS version 23.0 for analysis. Descriptive  
187 statistics like frequency, proportion, mean, and standard deviation employed to describe  
188 socio-demographic, clinical, and behavioral characteristics of patients. To identify predictors  
189 of thyroid dysfunction in diabetes, first, each independent variable with the  
190 outcome/dependent variable checked using bivariate logistic regressions. And those variables  
191 with p value <0.25 selected, imported, and adjusted using multivariate logistic regression  
192 with adjusted odds ratio (AOR), 95% CI. Variables with *P-value* < 0.05 declared statistically  
193 significant.

#### 194 **Ethical Approval**

195 Ethical clearance obtained from the Research Ethics Review Committee (RERC) of Dire-  
196 Dawa University. Permission granted by Dire Dawa Regional Health Bureau (DDRHB) and



197 medical directors of Bilal and Delt hospitals. Informed consent signed and obtained from the  
198 participants after necessary explanation made about the purpose of the study, the risk and  
199 benefits, and also their rights of participating in the study. Interviews with subjects made with  
200 strict privacy and confidentiality was assured. The rights of respondents to refuse answering  
201 some or any questions respected. Those study participants who require treatment or  
202 modification of regimen have got feedback letters to the clinic where they do follow-up  
203 visits.

204

## 205 **Result**

### 206 **Socio-demographic Comparison of cases and controls**

207 A total of 275 subjects included in the final analysis: 92 were cases and the remaining 183  
208 were controls. The mean age of subjects in cases was  $53.6 \pm 14.01$  years and it was  $55.65 \pm$   
209  $13.625$  years in controls. The independent t-test showed no significant difference in the mean  
210 age between the case and control [t- value = -1.165; *p-value*= 0.245]. On the other hand,  
211 majority of participants were females accounting 72(78.2%) and 107(58.4%) among cases  
212 and controls, respectively. The difference in the proportion of gender between the two groups  
213 was tested and females are predominate which is statistically significant [AOR= 2.548 (1.15,  
214 5.665); *p-value*= 0.02] (Table 1).

215 **Table 1: Comparison of Socio-demographic and Related Variables and Association**  
216 **with Dependent Variable**

| Variable          | Category  | Case | Control | COR (95%CI)      | AOR (95%CI)      | P-Value       |
|-------------------|-----------|------|---------|------------------|------------------|---------------|
| Gender            | Male      | 20   | 71      | 1                | 1                | <b>0.022*</b> |
|                   | Female    | 72   | 107     | 2.5(1.43-4.54)   | 2.5 (1.15, 5.67) |               |
| Educational level | No formal | 25   | 47      | 1                | 1                | <b>0.013*</b> |
|                   | Primary   | 34   | 41      | 0.7(0.557-0.905) | 1.5(1.03, 1.67)  |               |

|                      |                |    |     |                  |                   |               |
|----------------------|----------------|----|-----|------------------|-------------------|---------------|
|                      | Secondary      | 28 | 47  | 0.8(3.81-5.17)   | .11(.06, .48)     | <b>0.03*</b>  |
|                      | Post-secondary | 5  | 48  | 0.67(4.56-7.69)  | .21(.062, .85)    | <b>0.028*</b> |
| Marital status       | Single         | 5  | 11  | 1                | 1                 |               |
|                      | Married        | 71 | 123 | 1.015(0.24-4.25) | 0.11(0.03, 10.45) | 0.722         |
|                      | Widowed        | 10 | 36  | 0.8(2.91-2.19)   | 0.13( 0.01, 1.11) | 0.062         |
|                      | Divorced       | 6  | 13  | 1.7(0.50-5.48)   | 0.49(0.46, 5.28)  | 0.557         |
| Occupation           | Employed       | 29 | 92  | 2.2(1.29-3.72)   | 2.3(0.96, 5.63)   | 0.061         |
|                      | Unemployed     | 63 | 91  | 1                | 1                 |               |
| Income               | < 5000 Birr    | 24 | 59  | 1                | 1                 |               |
|                      | 5000 -10000    | 44 | 87  | 1.7(0.83-3.40)   | 1.6(0.5, 5.20)    | 0.424         |
|                      | >10, 000Bir    | 24 | 35  | 1.35(0.72-2.55)  | 1.5(0.49, 4.82)   | 0.465         |
| Duration of Diabetes | <5 years       | 54 | 97  | 1                | 1                 |               |
|                      | 5-10 year      | 28 | 53  | 0.54(0.25-1.19)  | .29(.092, .95)    | <b>.040*</b>  |
|                      | > 10 years     | 10 | 33  | 0.57(0.25,1.33)  | .63(.20, 1.99)    | .434          |

217 \*P-value is statistically significant

218 Among the case, 25(27.2%) have no formal education, 34(37.0 %) have a primary education,  
 219 and 28(30.4%) attended high school. Among the controls, 47(25.7%) have no formal  
 220 education, 49.9(22.4%) and 49.9 (25.7%) attended primary and high school education. It was  
 221 found that all forms of educational levels have significantly associated with thyroid  
 222 dysfunction. Regarding employment status, 63(68.5%) of cases and almost half (49.7%)  
 223 controls were unemployed. Even if it showed association in binary logistic regression [COR=  
 224 2.196; 95%CI (1.297-3.719)], failed when adjusted in multiple regression.

225 Out of the total 92 cases, 54(58,7%), 28(30.4%), and 10(10.9%) had a history of diabetes less  
 226 than 5years, 5-10years, and more than 10years, respectively. Whereas, 101(55.2%),

227 50(27.3%), and 32(17.5%) controls had diabetes for less than 5years, 5- 10years, and more  
228 than 10years, respectively. Having 5-10years of diabetes showed statistically significant  
229 association with TD [AOR = 0.95; 95%CI (0.9, .94); p = 0.04] (Table 1).

### 230 Self-Care and Behaviors Related To Blood Glucose Control among Study Groups

231 It was found that 67% of cases consume a healthy diet more than 3 times per week including  
232 fruit, vegetables, high fiber diet, and low unsaturated fat; 72% of controls also do so. In  
233 addition, adherence to diabetic diet eating plan adequately practiced in 64% of cases and 72%  
234 of controls. However, both variables showed no significant association with TD (p>0.05)  
235 (Table 2).

236 **Table 2: Self-Care and Behaviors Related To Blood Glucose Control among Study**  
237 **Groups**

| Variable     | Category | Case | Control | COR (95%CI)      | AOR (95%CI)      | P-Value |
|--------------|----------|------|---------|------------------|------------------|---------|
| Exercise     | <3x/wk   | 66   | 123     | 1.2(0.71, 2.1)   | 1.8(0.76, 4.30)  | 0.182   |
|              | >3x/wk   | 26   | 60      | 1                | 1                |         |
| SMBG         | <3x/wk   | 103  | 171     | 0.4(0.22, .73)   | 0.55(0.21, 1.46) | 0.237   |
|              | >3x/wk   | 30   | 26      |                  |                  |         |
| Smoking      | Yes      | 6    | 11      | 1.1(0.39, 3.05)  | 0.91(0.31, 2.67) | 0.869   |
|              | No       | 86   | 172     | 1                | 1                |         |
| Alcohol      | Yes      | 3    | 9       | 1.5(0.41, .80)   | 1.0(0.99-1.01)   | 0.741   |
|              | No       | 89   | 174     | 1                | 1                |         |
| Hypertension | Yes      | 49   | 90      | 1.2 (0.97, 1.94) | 0.9(0.44, 1.93)  | 0.830   |
|              | No       | 43   | 93      | 1                | 1                |         |
| Healthy diet | <3x/wk   | 30   | 62      | 0.73( .42,1.3)   | 1.2(.17, 8.74)   | .855    |
|              | >3x/wk   | 48   | 135     | 1                | 1                |         |
| Following    | <3x/wk   | 33   | 52      | 1.4(.82, 2.4)    | .78(.11, 5.66)   | .806    |

|                |        |    |     |                |                |      |
|----------------|--------|----|-----|----------------|----------------|------|
| dietary plan   | >3x/wk | 59 | 131 | 1              | 1              |      |
| Unhealthy diet | <3x/wk | 49 | 121 | .58( .35, .97) | .66(.29, 1.49) | .318 |
| diet           | >3x/wk | 43 | 62  | 1              | 1              |      |

238 \*P-value is statistically significant

239

240 Regarding an unhealthy diet such as high-fat food, full-fat dairy products, 46.7% of cases and  
 241 29.5 % of controls consume more than 3 times a week in the last 7 days. Although  
 242 association between thyroid dysfunction and unhealthy diet observed on bivariate logistic  
 243 regression, it failed when adjusted on multivariate analysis (p= 0.318). About 28.3% of cases  
 244 and 32.8% controls involved at least 30 minutes of exercise 3 times per week.

245 Adherence to diabetes medication is also requested, 96% of cases and controls take their  
 246 medications at least 5 days per week. Only 6 of the 92 cases and 11 of the 183 controls have a  
 247 smoking history. With the same token 3 of the cases and 9 of the controls have a history of  
 248 alcohol intake, and 49(53%) of cases and 90(49.2%) of controls have hypertension diagnosed  
 249 before and/or during this study. However, none of them showed significant association with  
 250 TD.

### 251 **Glycemic Control and Thyroid Dysfunction**

252 The mean glycated hemoglobin level of subjects in cases was  $10.32 \pm 2.4$  % and it was  $9.249$   
 253  $\pm 2.3$  in controls. The difference in the HbA1c between the two groups showed statistically  
 254 significant as analyzed by an independent t-test [ $t= 3.518$ ;  $df= 273$ ;  $p= 0.001$ ; 95% C.I (0.47,  
 255 1.67)]. The mean total cholesterol in cases ( $193.5 \pm 49.47$ ) was higher than the controls  
 256 ( $184.35 \pm 53.7$ ). In contrary, the mean of triglycerides and high-density lipoprotein (HDL)  
 257 was higher for controls than the cases, yet no significant association observed. However, the  
 258 mean of low-density lipoprotein (LDL)-cholesterol between cases ( $116.92 \pm 45.9$ ) and

259 controls (102.34 ±43.97) showed statistically significant difference in the means [(t= 2.420,  
260 df= 241, p= 0.016)] (Table 3).

261 **Table 3: Comparison between Participants with Thyroid Dysfunction and Euthyroid in**  
262 **Type 2 Diabetes Patients Regarding the Different Clinical Parameters.**

| Variable          | Group   | N   | Mean    | Std. Deviation | T     | Significance | 95 % confidence interval |       |
|-------------------|---------|-----|---------|----------------|-------|--------------|--------------------------|-------|
| Age               | Case    | 92  | 53.6    | 14.1           | -1.16 | 0.24         | -5.5                     | 1.4   |
|                   | Control | 183 | 55.65   | 13.6           |       |              |                          |       |
| HgA1c level       | Case    | 92  | 10.3207 | 2.41531        | 3.518 | 0.001*       | 0.47                     | 1.167 |
|                   | Control | 183 | 9.2497  | 2.36522        |       |              |                          |       |
| Total Cholesterol | Case    | 88  | 193.50  | 49.472         | 1.337 | 0.182        | 4.319                    | 22.8  |
|                   | Control | 175 | 184.35  | 53.697         |       |              |                          |       |
| Triglyceride      | Case    | 88  | 160.83  | 93.772         | -.459 | 0.647        | -29.1                    | 18.1  |
|                   | Control | 173 | 166.33  | 90.393         |       |              |                          |       |
| HDL               | Case    | 84  | 48.46   | 12.159         | 1.129 | 0.260        | -18.0                    | 4.9   |
|                   | Control | 159 | 55.04   | 52.643         |       |              |                          |       |
| LDL               | Case    | 84  | 116.92  | 45.911         | 2.420 | 0.016*       | 2.214                    | 26.44 |
|                   | Control | 159 | 102.34  | 43.972         |       |              |                          |       |

263 \*P-value is statistically significant; HDL= high-density lipoprotein; LDL= low-density  
264 lipoprotein

265

### 266 **Thyroid Dysfunction and Diabetic Complications**

267 On bivariate logistic regression analysis, diabetic retinopathy, diabetic foot, and diabetic  
268 neuropathy associated with thyroid dysfunction. After controlling the potential confounding

269 factor including glycemic level, multivariate logistic regression identified diabetic neuropathy  
 270 and retinopathy are independently associated with thyroid dysfunction. Accordingly, the odds  
 271 of having thyroid dysfunction in patients with diabetic retinopathy is 9.3 times higher than  
 272 diabetic patients with no retinopathy [(AOR= 9.334; 95%C.I. (2.049-42.51)]. Similarly, the  
 273 odds of having an abnormal thyroid function test were 3.5 times higher in diabetic sensory  
 274 neuropathy patients than patients without [(AOR= 3.523; 95 C. I. 1.640, 7.571)]. However,  
 275 coronary artery disease and diabetic nephropathy have no association with thyroid  
 276 dysfunction (Table 4).

277 **Table 4: Comparison of Groups Concerning Diabetic Complication and Thyroid**  
 278 **Dysfunction**

| Variable             | Category | Case | Control | COR(95%CI)       | AOR(95%CI)       | P-Value |
|----------------------|----------|------|---------|------------------|------------------|---------|
| Diabetic foot        | Yes      | 14   | 9       | 3.7(1.63, 8.4)   | 3.5 (.79, 15.04) | 0.097   |
|                      | No       | 78   | 174     | 1                | 1                |         |
| Diabetic neuropathy  | Yes      | 46   | 41      | 1.92(1.07, 3.42) | 3.3(1.19, 8.92)  | 0.021*  |
|                      | No       | 46   | 142     | 1                | 1                |         |
| Diabetic retinopathy | Yes      | 27   | 5       | 6.2(6.9, 10.5)   | 9.3(2.05, 42.51) | 0.04*   |
|                      | No       | 65   | 178     | 1                | 1                |         |
| Nephropathy          | Yes      | 19   | 34      | 0.03(0.02, 0.05) | 0.75(0.29, 1.99) | 0.571   |
|                      | No       | 72   | 148     | 1                | 1                |         |
| CAD                  | Yes      | 31   | 70      | 1.2(0.72, 2.08)  | 1.04(0.47, 2.28) | 0.931   |
|                      | No       | 61   | 113     | 1                | 1                |         |

279 *\*P-value is statistically significant; CAD = Coronary Artery Disease*

280

281 **Thyroid Dysfunction and Medications**

282 The majority of patients, 67% of cases and 72.8% of controls took metformin. Whereas  
 283 Sulfonuria is less used: (19%) of cases versus (24%) of controls. Insulin as a sole  
 284 hypoglycemic agent used only in 9.7% of cases and 15.8% of controls; insulin with other oral  
 285 hypoglycemic agents used in 20.6% of cases versus 14.8% of controls. However, none of the  
 286 studied diabetic medications had statistically significant association (see Table 5).

287 **Table 5: Comparison of Groups Related to Thyroid Dysfunction Associated with Drugs**

| Variable   | Category | Case | Control | COR(95%CI)      | AOR(95%CI)      | P-Value |
|------------|----------|------|---------|-----------------|-----------------|---------|
| METFORMIN  | Yes      | 67   | 123     | 1.3(.752- 2.27) | 1.3(0.56-2.69)  | 0.605   |
|            | No       | 25   | 60      | 1               | 1               |         |
| SULFONUREA | Yes      | 18   | 44      | 0.77(.42-1.42)  | 0.6(0.25- 1.52) | 0.289   |
|            | No       | 74   | 139     | 1               | 1               |         |
| SGLT 2     | Yes      | 3    | 6       | .99(.24-4.07)   | 1.8 (.33-10.54) | 0.484   |
|            | No       | 89   | 177     | 1               | 1               |         |
| INSULIN    | Yes      | 19   | 27      | 0.58 (.26-1.27) | 0.36(.11-1.16)  | 0.90    |
|            | No       | 73   | 155     | 1               | 1               |         |
| STATIN     | Yes      | 56   | 103     | 1.21(.73-2.01)  | 0.8(.37-1.74)   | 0.57    |
|            | No       | 36   | 80      | 1               | 1               |         |
| ACE/ARB    |          | 34   | 39      | 2.2(1.25-3.76)  | 2.5(1.10- 5.73) | 0.028*  |
|            |          | 58   | 144     | 1               | 1               |         |
| ANTIPLATE  |          | 26   | 47      | 1.14(0.65-2.0)  | 1.15(0.49-2.69) | 0.751   |
|            |          | 66   | 136     | 1               | 1               |         |

288 \*P-value is statistically significant; SGLT 2= Sodium-Glucose Co-Transporter 2

289 ACE/ARB= Angiotensin-Converting Enzyme Inhibitor/ Angiotensin II Receptor Blocker

290

291 Lipid lowering agent statins used in large proportions by both subjects: 60% cases and 56%  
292 controls. Yet its was not associated with the dependent variable. Angiotensin-converting  
293 enzyme inhibitor or angiotensin II blocker has been used in 34(36.9%) of cases and  
294 39(21.3%) control patients. And this showed statistically significant association [AOR 2.16;  
295 95% CI (1.247, 3.758); p= 0.005].

296

## 297 **Discussion**

298 DM and thyroid disorders are the two common endocrinopathies seen in the adult population.  
299 Studies have shown a very high prevalence of thyroid dysfunction in type 2 DM. Insulin and  
300 thyroid hormones are intimately involved in cellular metabolism and thus excess or deficit of  
301 either of them may result in the functional derangement of the other [18-23].

302 This study assesses, the association of glycemic control with thyroid dysfunction, predictors  
303 of thyroid dysfunction, and association of thyroid dysfunction with chronic diabetic  
304 complications.

### 305 **Glycemic Control and Thyroid Dysfunction**

306 In this study degree of blood glucose control in diabetes patients with thyroid dysfunction is  
307 poorer than controls as the mean glycosylated hemoglobin level was  $10.32 \pm 2.4\%$  and it was  
308  $9.249 \pm 2.3\%$  in controls. The difference is statistically significant (p= 0.001) which  
309 underlines the association of chronic hyperglycemia and thyroid dysfunction. A similar case-  
310 control study done by Alsolami showed elevated HbA1c levels linked with thyroid  
311 dysfunction [24]. Contrary to our finding, Diez et al and Mahalingam, et al in their studies  
312 found no association [22-23, 25]. The association of hyperglycemia with thyroid dysfunction  
313 may be due to the adverse effects of chronic hyperglycemia on the hypothalamic-pituitary  
314 axis where it blunts or abolishes the nocturnal TSH peak [20, 14, 26]



315 As insulin resistance is thought to be central in the pathophysiology of the development of  
316 thyroid dysfunction, the duration of diabetes has been considered to be an important risk for  
317 thyroid dysfunction (more than 5 years) mainly in hypothyroidism. Our finding revealed that  
318 T2DM patients with 5 to 10 years duration of diabetes had higher odds of developing thyroid  
319 dysfunction than less duration. However, there is no association in this study [27, 14, 26]

### 320 **Socio-Demographic Predictors of Thyroid Dysfunction**

321 In this study, females formed 65% of participants, and being female has 2.5 times the odds of  
322 having thyroid dysfunction than their male counterparts. This female preponderance is also  
323 demonstrated by Ogbonna (2019) [28], 60% of participants were females as well as studies  
324 done by Ghazali et al (2010) [21].

325 Both thyroid dysfunction and T2DM are among advanced age groups. In our study, the mean  
326 age of cases was 53.6( $\pm$ 14.01) years and 55.65( $\pm$ 13.625) years for controls. This was  
327 comparable with the report by Alolami where 55.7 years and 50.2 years the mean age of  
328 cases and controls, respectively. However, Ogbonna reported higher mean age of 57.5 years  
329 for cases and 57.7 years for controls. Despite advanced mean age of both groups, there was  
330 no significant difference observed which is in line with several studies [25, 29, 26].

331 This study also revealed that T2DM patients with just primary education had 1.5 times the  
332 odds of having thyroid dysfunction. On the other hand, T2DM patients who have secondary  
333 education and post-secondary education had less likely to have TD ( $p= 0.02$ ) and ( $p= 0.028$ ),  
334 this implies better educational levels being protective. This is logical since a better  
335 educational level may yield better blood glucose control which is associated with normal  
336 thyroid function. However, the Brazilian Longitudinal Study of Adult Health (ELSA-Brasil),  
337 showed highly educated patients have a higher frequency of thyroid disorder [29].

### 338 **Cardiovascular Risks and Thyroid Dysfunction in Type 2 Diabetes**

339 In studies, thyroid dysfunction is considered a cardiovascular risk; one of the reasons is the  
340 presence of associated hyperlipidemia. Hypercholesterolemia, especially in hypothyroidism,  
341 probably results from reduced catabolism of lipoproteins, a phenomenon that may be  
342 explained by a decreased expression of lipoprotein receptors. In this study, level of LDL was  
343 associated with TD with mean LDL value of 116.92 ( $\pm 45.9$ ) for cases and 102.34 ( $\pm 43.97$ )  
344 for control. This will predispose for the acceleration of atherosclerosis and early development  
345 of cardiovascular complications [28, 26]. Even if hypertension is common in diabetes and  
346 thyroid dysfunction, this study did not find an association with thyroid dysfunction.  
347 Hypertension as a predictor in several studies is inconsistent [20, 14].

#### 348 **Diabetic Complications in Patients with Thyroid Dysfunction**

349 Since TD is associated with poor blood glucose control, it is expected to worsen and  
350 accelerate the development of chronic complications. The effect of TD in aggravating  
351 microvascular complications of T2DM has been studied with inconsistent findings. In this  
352 study, T2DM patients with TD demonstrated strong association with diabetes retinopathy ( $p=$   
353 0.04). This was in line with the study done by Mohammed et al., subclinical hypothyroidism  
354 was associated with a higher frequency of microvascular (diabetic retinopathy) [26].  
355 Moreover, significant association of diabetic neuropathy with thyroid dysfunction also  
356 observed ( $p= 0.021$ ), but diabetic nephropathy did not associated. In contrary to our findings,  
357 studies done in Saudi Arabian, in Kuwait and Nigeria showed that T2DM patients with TD  
358 are more likely to suffer from nephropathy ( $P<0.001$ ) [25, 14], but found no significant  
359 association with neuropathy and retinopathy [25, 14, 26].

360 It is known that hypothyroidism and T2DM are independently linked to the development of  
361 coronary artery disease. Studies reported thyroid dysfunction of all spectrums to have an  
362 association with coronary artery disease. However, this study did not, which could be due to  
363 the relatively small sample size. Further study, probably a prospective cohort study is needed

364 to elucidate the presence and strength of association [30-31]. As a result, there is a general  
365 trend of increased complications in patients with thyroid dysfunction. This could imply that  
366 the coexistence of both thyroid dysfunction and T2DM could alter patients' health conditions  
367 and metabolic control, and might also increase mortality. This could also decrease the quality  
368 of life for those patients if not detected early.

### 369 **Use of Medications and Thyroid Dysfunctions**

370 Thyroid function is influenced by several drugs. Anti-diabetic drugs also incriminated in  
371 thyroid hormonal homeostasis. Metformin has a well-studied influence in lowering TSH,  
372 goitrogenic effect, Sulphonurias has reported higher incidence of hypothyroidism, and Insulin  
373 also increases the secretion of TRH and TSH [32]. This study has not found any association  
374 among anti-diabetic medications and statin with thyroid dysfunction. However, there is a  
375 significant association with angiotensin-converting enzyme inhibitors and angiotensin  
376 receptor blocking drugs (ACEI, ARB) ( $p=0.028$ ). It can be related to the central effect of  
377 these drugs suppressing TSH secretion. Regardless, more study is necessary to justify its  
378 association, since no study has discovered by the investigator.

379

### 380 **Conclusion**

381 Thyroid dysfunction in T2DM patients is a common condition associated with poor blood  
382 glucose control and chronic diabetic complications: diabetic retinopathy and diabetic  
383 neuropathy.

384 Diabetes patients with thyroid dysfunction have higher lipid levels (LDL cholesterol) than  
385 patients without thyroid dysfunction; as a result T2DM patients with TD are at higher risk of  
386 cardiovascular diseases. Female gender, lower educational level, and drugs are associated  
387 with thyroid dysfunction. Majority of patients, both in cases and controls groups, have  
388 unacceptably elevated glycated hemoglobin levels which need to be addressed to prevent

389 morbidity and mortality. Thus, screening for thyroid dysfunction in T2DM patients,  
390 especially the female gender, needs to be done.

### 391 **Recommendation**

392 ***Regional health bureau*** should:

- 393 • Consider to avail hormone test machine and reagents required for thyroid function test  
394 and glycated hemoglobin level at public health facilities.
- 395 • Create awareness among health professionals and to the public as diabetes is a public  
396 health problem in the region and significant portions of these populations are expected  
397 to have thyroid dysfunction.
- 398 • Attention should be given to enhance knowledge the population as this study showed  
399 increased level of education may prevent development of thyroid dysfunction

### 400 ***To health facilities***

- 401 • Health facilities should take the responsibility of screening diabetes patients for  
402 thyroid dysfunction specially women;
- 403 • Should give due attention to treat patient to the target following guideline
- 404 • Health facilities should provide adequate education

### 405 ***To the patients***

- 406 • Patients should know rationale of good glycemic control and be advised to adhere to  
407 medication and follow up and should be warned the consequence of persistent  
408 hyperglycemia and presence of thyroid dysfunction

### 409 ***To researchers***

- 410 • Longitudinal study is essential to assess predictors over time; the reason for  
411 inconsistent association of chronic complication; and to further analyze effects of  
412 medication on thyroid function tests such as angiotensin converting enzymes  
413 inhibitors or angintenin blockers.

## 414 **Acknowledgment**

415 We acknowledge Dire Dawa University, College of Medicine and Health Science,  
416 Department of Public Health facilitating to conduct this study. Our heartfelt gratitude goes to  
417 all study participants, all data collectors and health professionals in both hospitals for their  
418 unreserved help and facilitation. Finally, we would like to appreciate Dr. Kedir Teji, Sister  
419 Hanna Lambero and Nebiyu Damtew for their unreserved technical assistance.

420

## 421 **References**

- 422 1. Persani, L. Central hypothyroidism: pathogenic, diagnostic, and therapeutic  
423 challenges. *J Clin Endocrinol Metab.* 2012;97:3068-3078. doi:10.1210/jc.2012-1616
- 424 2. Hadlow NC, Rothacker KM, Wardrop R, Brown SJ, Lim EM, Walsh JP. The  
425 relationship between TSH and free T<sub>4</sub> in a large population is complex and nonlinear  
426 and differs by age and sex. *J Clin Endocrinol Metab.* 2013 Jul;98(7):2936-43. doi:  
427 10.1210/jc.2012-4223. Epub 2013 May 13. PMID: 23671314.
- 428 3. Laulund AS, Nybo M, Brix TH, Abrahamsen B, Jørgensen HL, Hegedüs L. Duration  
429 of thyroid dysfunction correlates with all-cause mortality. the OPENTHYRO Register  
430 Cohort. *PLoS One.* 2014;9(10):e110437. Published 2014 Oct 23.  
431 doi:10.1371/journal.pone.0110437
- 432 4. Taylor, P., Albrecht, D., Scholz, A. 1. Global epidemiology of hyperthyroidism and  
433 hypothyroidism. *Nat Rev Endocrinol* 14, 301–316 (2018).  
434 <https://doi.org/10.1038/nrendo.2018.18>
- 435 5. Chaker, L., Bianco, A. C., Jonklaas, J. & Peeters, R. P. Hypothyroidism. *Lancet*,  
436 doi:10.1016/s0140-6736(17)30703-1 (2017).

- 437 6. Wang, “The relationship between type 2 diabetes mellitus and related thyroid  
438 diseases,” *Journal of Diabetes Research*, vol. 2013, Article ID 390534, 9 pages, 2013.  
439 [5]
- 440 7. Al-Geffari, N. A. Ahmad, A. H. Al-Sharqawi, A. M. Youssef, D. Alnaqeb, and K.  
441 Al-Rubeaan, “Risk factors for thyroid dysfunction among type 2 diabetic patients in a  
442 highly diabetes mellitus prevalent society,” *International Journal of Endocrinology*,  
443 vol. 2013, Article ID 417920, 6 pages, 2013.
- 444 8. Osei Sarfo-Kantanka, Eunice Oparebea Ansah, Ishmael Kyei, Nana Ama Barnes,  
445 Causes and predictors of mortality among Ghanaians hospitalised with endocrine  
446 disorders, *International Health*, Volume 12, Issue 2, March 2020, Pages 107–115,  
447 <https://doi.org/10.1093/inthealth/ihz038>
- 448 9. Ladenson, P. A. Singer, K. B. A, “American thyroid association guidelines for  
449 detection of thyroid dysfunction,” *Archives of Internal Medicine*, vol. 160, no. 11, pp.  
450 1573–1575, 2000.
- 451 10. Brenta, S. Danzi, and I. Klein, “Potential therapeutic applications of thyroid hormone  
452 analogs,” *Nature Clinical Practice Endocrinology and Metabolism*, vol. 3, no. 9, pp.  
453 632–640, 2007.
- 454 11. Centers for Disease Control and Prevention, National Diabetes Statistics Report,  
455 Atlanta, GA, USA, Centers for Disease Control and Prevention, US Dept of Health  
456 and Human Services, 2017
- 457 12. Mengesha, M.M., Roba, H.S., Ayele, B.H. Level of physical activity among urban  
458 adults and the socio-demographic correlates: a population-based cross-sectional study  
459 using the global physical activity questionnaire. *BMC Public Health* **19**, 1160 (2019).  
460 <https://doi.org/10.1186/s12889-019-7465-y>

- 461 13. Ethiopian Government Portal. The Dire Dawa administrative council. Ethiopian  
462 Government Portal. 2012 [cited 2016 Jan 9]; Available at:  
463 URL:<http://www.ethiopia.gov.et/dire-dawa-city-administration>.
- 464 14. Olmos RD, Figueiredo RC, Aquino EM, Lotufo PA, Bensenor IM. Gender, race and  
465 socioeconomic influence on diagnosis and treatment of thyroid disorders in the  
466 Brazilian Longitudinal Study of Adult Health (ELSA-Brasil). *Braz J Med Biol Res.*  
467 2015;48(8):751-758. doi:10.1590/1414-431X20154445
- 468 15. ["WHO Mean Body Mass Index \(BMI\)"](#). World Health Organization. Retrieved 5  
469 February 2019
- 470 16. Wiersinga WM. De interpretatie van de bepaling van thyreoïdstimulerend hormoon  
471 (TSH) [The interpretation of the thyroid stimulating hormone (TSH) assay]. *Ned*  
472 *Tijdschr Geneeskd.* 2003 Jun 14;147(24):1156-8. Dutch. PMID: 12845833.
- 473 17. Fei X, Xing M, Wo M, Wang H, Yuan W, Huang Q. Thyroid stimulating hormone  
474 and free triiodothyronine are valuable predictors for diabetic nephropathy in patient  
475 with type 2 diabetes mellitus. *Ann Transl Med.* 2018;6(15):305.  
476 doi:10.21037/atm.2018.07.07
- 477 18. Asmelash D, Tesfa K, Biadgo B. Thyroid Dysfunction and Cytological Patterns  
478 among Patients Requested for Thyroid Function Test in an Endemic Goiter Area of  
479 Gondar, North West Ethiopia. *Int J Endocrinol.* 2019 Aug 14;2019:9106767. doi:  
480 10.1155/2019/9106767. PMID: 31511773; PMCID: PMC6710807
- 481 19. Bharadiya AA, AundhkarSC, Jaju JBet. Evaluation of thyroid function tests in  
482 patients with uncontrolled type 2 diabetes mellitus. *Int J Health Sci Res.*  
483 2014;4(5):129-138.

- 484 20. Elmenshawi IM, Alotaibi SS, Alazmi AS, Prevalence of thyroid dysfunction in  
485 diabetic patients. J Diabetes Metab Disord Control. 2017;4(2):55-60. DOI:  
486 [10.15406/jdmdc.2017.04.00106](https://doi.org/10.15406/jdmdc.2017.04.00106)
- 487 21. Ghazali and Abbiyesuku , Thyroid dysfunction in type 2 diabetics seen at the  
488 University College Hospital, Ibadan, Nigeria, Nig. J, Physiol. Sci. 25 (2010): 173 –  
489 179 [www.njps.physocnigeria.org](http://www.njps.physocnigeria.org)
- 490 22. Brenta G. Diabetes and thyroid disorders. The British Journal of Diabetes & Vascular  
491 Disease. 2010;10(4):172-177. doi:[10.1177/1474651410371321](https://doi.org/10.1177/1474651410371321)
- 492 23. Elgazar EH, Esheba NE, Shalaby SA, Mohamed WF. Thyroid dysfunction prevalence  
493 and relation to glycemic control in patients with type 2 diabetes mellitus. Diabetes  
494 Metab Syndr 2019;13:2513-7)
- 495 24. Tunbridge, D. C. Evered, and R. Hall, “The spectrum of thyroid disease in a  
496 community: the Whickham survey,”Clinical Endocrinology, vol. 7, no. 6, pp. 481–  
497 493, 1977)
- 498 25. Diez JJ, Sanchez P, Iglesias P. Prevalence of thyroid dysfunction in patients with type  
499 2 diabetes. Exp Clin Endocrinol Diabetes 2011;119:201-7
- 500 26. Osei Sarfo-Kantanka, Fred Stephen Sarfo, Eunice Oparebea Ansah, Ishmael Kyei,  
501 "The Effect of Thyroid Dysfunction on the Cardiovascular Risk of Type 2 Diabetes  
502 Mellitus Patients in Ghana", Journal of Diabetes Research, vol. 2018, Article ID  
503 4783093, 8 pages, 2018. <https://doi.org/10.1155/2018/4783093>
- 504 27. Alsolami AA, Alshali KZ, Albeshri MA, Alhassan SH, Qazli AM, Almalki AS, et al.  
505 Association between type 2 diabetes mellitus and hypothyroidism: a case–control  
506 study.IntJGenMed.2018;11:457-461  
507 <https://doi.org/10.2147/IJGM.S179205>



- 508 28. Ogbonna SU and Ezeani IU Risk Factors of Thyroid Dysfunction in Patients With  
509 Type 2 Diabetes Mellitus. *Front. Endocrinol.* 10:440.doi: 10.3389/fendo.2019.00440
- 510 29. Mehalingam V, Sahoo J, Bobby Z, Vinod KV. Thyroid dysfunction in patients with  
511 type 2 diabetes mellitus and its association with diabetic complications. *J Family Med*  
512 *Prim Care* 2020;9:4277-81.
- 513 30. Standard of care diabetes 2020 *Diabetes Care* 2020;43(Suppl. 1):S1–S2 |  
514 <https://doi.org/10.2337/dc20-SINT>
- 515 31. Martin SS, Daya N, Lutsey PL,. Thyroid Function, Cardiovascular Risk Factors, and  
516 Incident Atherosclerotic Cardiovascular Disease: The Atherosclerosis Risk in  
517 Communities (ARIC) Study. *J Clin Endocrinol Metab.* 2017;102(9):3306-3315.  
518 doi:10.1210/jc.2017-00986
- 519 32. Bernadette Biondi, George J Kahaly, R Paul Robertson, Thyroid Dysfunction and  
520 Diabetes Mellitus: Two Closely Associated Disorders, *Endocrine Reviews*, Volume  
521 40, Issue 3, June 2019, Pages 789–824, <https://doi.org/10.1210/er.2018-00163>  
522
